# Supplementary material
Source: PubMed Central journal article supplement (PMC3961755)

## **Supplementary Figure Legends:**

### **Supplementary Figure S1. Malignant Characteristics of Invasive Adenocarcinoma in K-ras<sup>LA1</sup> Mice**

(A – G) Representative images of H&E-stained sections from K-ras<sup>LA1</sup> mice with invasive adenocarcinoma demonstrating invasion of pleural surface (A), intravasation into vasculature (B), implantation on intercostal muscle (C), invasion into hilar node (D), invasion into heart (E), and metastases to liver (F) and kidney (G).

Scale bars denote 100  $\mu\text{m}$ .

### **Supplementary Figure S2. Radiation Effects on the Incidence of Various Endpoints in K-ras<sup>LA1</sup> Mice**

Overall incidences of lung tumors extending into bronchial airways (A), pneumonia (B), lymphoma (C), leukemia (D), lymphoma and leukemia combined (E), myeloproliferative disease (F), and focal liver hyperplasia and hepatoma in combined (G).

### **Supplementary Figure S3. Comparative Genomic Analyses and Classifier Isolation from Irradiated Versus Unirradiated Control K-ras<sup>LA1</sup> Mice.**

(A) Flowchart of overall analyses including integration of human cancer microarray datasets.

(B) Clustering of mouse samples using raw expression values and *lumi* package detected single outlier for exclusion from further analysis.

(C) Box plots of expression intensities from raw data (left panel) or after background correction and quantile normalization using *MBCB* package (right panel).

(D) Beta-uniform mixture model analysis of p-values (left panels) and hierarchical clustering using *classComparison* package with *t*-tests comparing with 632-gene set.

#### **Supplementary Figure S4. Comparative Genomic Analysis of Whole Lungs Reveals Unique Gene Classifiers Capable of Specifying Individual Experimental Cohorts**

(A) Schematic representation of experimental design.

(B) Hierarchical clustering and associated heatmap demonstrating capacity of 632 genes to segregate experimental cohorts. (ANOVA;  $p < 0.05$ ).

(C) Principal component analysis validates capability of 632 genes to segregate experimental cohorts.

(D – L) Hierarchical clustering (D – F), k-means clustering (G – I), and principal component analysis (J – L) demonstrate robust capacity of unique gene classifiers to identify and segregate the designated experimental cohort from the other two cohorts.

Black = Control; Red = Acute; Blue = Fractionated.

#### **Supplementary Figure S5. Only “Fractionated” Classifier Demonstrates Clinical Relevance for Lung Cancer Patient Survival**

(A – I) Lung adenocarcinoma patient samples were partitioned into two groups using k-mean clustering and classifiers identifying unirradiated K-ras<sup>LA1</sup> mice (A – C) or those irradiated with an acute (D – F) or fractionated dose (G – I) of 1.0 Gy <sup>56</sup>Fe- particles.

Kaplan-Meier survival plots using overall survival from each cluster demonstrates clinical relevance of “fractionated” classifier.

Red and black lines denote high-risk and low-risk patients respectively. Hazard ratios and 95% confidence intervals are relative to high-risk patients.

### **Supplementary Figure S6. “Fractionated” Classifier Capable of Predicting Overall Survival in Patients with Breast, but not Lung Squamous Cell Cancer**

Breast adenocarcinoma and lung squamous cell cancer patient samples were partitioned into two groups using k-means clustering and the 45-gene “fractionated” classifier.

Analysis of overall survival from patients in each partitioned group demonstrates capacity of “fractionated” to identify patients with decreased survival with breast (A – C) and not lung squamous cell (D – E) carcinoma.

Red and black lines denote high-risk and low-risk patients respectively. Hazard ratios and 95% confidence intervals are relative to high-risk patients.

### **Supplementary Figure S7. Cox Regression Analysis Exposes 6 Genes Within “Fractionated” Classifier Which Retain Predictive Capacity**

6 genes result from univariate Cox regression analysis ( $p < 0.01$ ) using SPORE dataset and the 45-gene “fractionated” classifier. Patient samples from lung adenocarcinoma (A – C), squamous cell carcinoma, (F – G), and breast adenocarcinoma (C – E) were partitioned into two groups using 6-genes. Kaplan-Meier survival analysis using overall survival from each partitioned group demonstrates predictive capacity of “fractionated” for lung and breast adenocarcinoma (A – E), and not lung squamous cell carcinoma (F – G), was retained.

Red and black lines denote high-risk and low-risk patients respectively. Hazard ratios and 95% confidence intervals are relative to high-risk patients.

### **Supplementary Methods:**

Microarray and Survival Analyses

All analysis was done using R 2.15.1 (<http://www.R-project.org/>) and tools in Bioconductor (<http://www.bioconductor.org/>) unless otherwise stated (1, 2). Mouse microarrays were performed using Illumina<sup>®</sup> MouseWG-6 v2.0 Expression BeadChips (Illumina). Samples were labeled and hybridized using Illumina<sup>®</sup> TotalPrep<sup>™</sup> kit (Ambion). Arrays were scanned using Illumina<sup>®</sup> Beadstation 500 BeadArray reader and data acquisitioned with BeadStudio (Illumina<sup>®</sup>). One sample was identified as an outlier using the *lumi* package, and removed (Figure S3B) (3). Remaining samples were background corrected (non-parametric) and quantile normalized using the Model-based Background Correction for Beadarray algorithm (*MBCB* package) (Figure S3C) (4). K-ras<sup>LA1</sup> expression data have been deposited under the accession number GSE42233 in the National Center for Biotechnology Information's Gene Expression Omnibus (GEO) public repository (<http://www.ncbi.nlm.nih.gov/geo/>). A variance filter was applied to retain only probes in which the inter-variation between any two classes was greater than the intra-variation in either class. This resulted in 4580 of 45,281 probes representing 4311 genes. Our analysis was limited to a final set of 1495 genes after cross-species gene mapping using AILUN (<http://ailun.stanford.edu/>) and cross-platform gene mapping by Entrez ID (5). An ANOVA, resulting in 632 genes, was performed using the *multtest* package (6); FDR was controlled using the Benjamini & Hochberg adjustment ( $\alpha = .05$ ). Hierarchical clustering of samples and clustering of genes for the heatmap (Figure S4B) were implemented using packages *classDiscovery* (<http://bioinformatics.mdanderson.org/Software/OOMPA>) (7) and *pheatmap* (<http://CRAN.R-project.org/package=pheatmap>) (8). Principal component analysis (Figure S4C) using R's *prcomp* was implemented without centering or scaling since all

datasets were previously standardized. For each pair of groups (Control vs. Acute, Control vs. Fractionated, and Acute vs. Fractionated), we performed *t*-tests in which FDR was controlled using the beta-uniform mixture modeling described by Pounds and Morris and implemented using the *classComparison* package (<http://bioinformatics.mdanderson.org/Software/OOMPA>) (9, 10). Classifiers were assigned using the set of common overlapping genes from the *t*-tests for each group assignment. Heatmaps for classifiers (Figures S4D - F) as previously described above. MacQueen's k-means clustering algorithm (k=2) and classical multidimensional scaling were implemented to create ordination plots using the *vegan* package (<http://CRAN.R-project.org/package=vegan>) (Figures S4G - I) (11, 12). Principal component analysis (Figures S4J - L) was performed as described above. Network analysis was performed using Ingenuity Pathway Analysis (Figures 4A - D & 7A; Ingenuity® Systems, [www.ingenuity.com](http://www.ingenuity.com)).

The NCI's Director's Challenge Consortium lung adenocarcinoma dataset (n=442) was downloaded from caArray (<https://array.nci.nih.gov/caarray/home.action>) (13). Raw data was background corrected using default parameters and quantile normalized using RMAExpress (<http://rmaexpress.bmbolstad.com/>) (14, 15). For the UT-Lung SPORE lung dataset (GSE41271, n=209), only samples annotated as adenocarcinoma stage I-III (n =151) or squamous cell carcinoma (n=57) and not having received neo-adjuvant therapy were utilized. Two additional lung datasets were downloaded from GEO (<http://www.ncbi.nlm.nih.gov/geo/>). Raw data for the Aichi lung adenocarcinoma dataset (GSE13213, n=117) (16) was background corrected and quantile normalized using the *limma* package (17), and processed data was downloaded for the Raponi squamous cell

carcinoma dataset (GSE4573, n=130) (18). The following breast datasets were also downloaded from GEO: processed data from Miller et al (GSE3454, n=236) (19), Pawitan et al (GSE1456, n=159) (20), and the RData file for Loi et al (GSE6532, n=380) (21). All breast datasets were limited to patients with complete annotations for disease specific survival time and status. We used the median PC1 method described by Venet et al to classify patients into two groups (22). For each of the classifiers, using the SPORE dataset, the first principal component (PC1) was computed and the dataset was split using the median of PC1. Association between overall survival to each classifier was evaluated in the three lung adenocarcinoma datasets by log-rank comparison of survival curves using Kaplan-Meier estimators computed in R with the *survival* package (Figure 3) (<http://CRAN.R-project.org/package=survival>) (23). The ‘predict’ method for *prcomp* was used with the “fractionated” classifier to predict the NCI and Aichi datasets using the first principal component computed from the SPORE dataset. The “fractionated” classifier was also tested using the aforementioned squamous cell and breast carcinoma datasets (Figure 6) with median PC1 method. To further evaluate the association of each classifier with overall survival ( $p < 0.01$ ), univariate Cox regression was applied. We repeated the median PC1 method for patient classification and survival analysis using the Cox-refined predictive 6-gene geneset derived the fractionated classifier (Figures 7B - K). Using the expression profiles of the complete classifiers as well as the Cox-filtered geneset, k-means clustering ( $k=2$ ) was used to partition datasets into 2 groups for which survival curves were compared as previously stated (Figure S7).

**Supplementary Tables:**

**Supplementary Table 1. Logistic Regression Analysis of Unirradiated K-ras<sup>LA1</sup>**

**Mice for Gender and Strain Effects on Various Endpoints.**

| <b>Phenotype</b>                   | <b>Independent Variable</b> | <b>Odds Ratio (95% CI)</b> |
|------------------------------------|-----------------------------|----------------------------|
| <b>Invasive Carcinoma</b>          | Gender                      | 2.67 (0.63, 11.23)         |
|                                    | Strain                      | 4.00 (0.95, 16.92)         |
| <b>Bronchial Extension</b>         | Gender                      | 1.25 (0.42, 3.73)          |
|                                    | Strain                      | 1.09 (0.37, 3.23)          |
| <b>Pneumonia</b>                   | Gender                      | 1.09 (0.40, 2.98)          |
|                                    | Strain                      | 0.71 (0.26, 1.94)          |
| <b>Lymphoma</b>                    | Gender                      | 2.24 (0.52, 9.66)          |
|                                    | Strain                      | 1.22 (0.31, 4.73)          |
| <b>Leukemia</b>                    | Gender                      | 2.32 (0.41, 13.02)         |
|                                    | Strain                      | 8.73 (0.98, 77.63)         |
| <b>Myeloproliferative Disorder</b> | Gender                      | 1.28 (0.20, 8.32)          |
|                                    | Strain                      | N/A                        |

Gender relative to males; Strain relative to 129S2.

**Supplementary Table 2. Logistic Regression Analysis for Gender and Strain Effects on Various Endpoints Controlling for Experiment.**

| <b>Phenotype</b>                   | <b>Independent Variable</b> | <b>Odds Ratio (95% CI)</b> |
|------------------------------------|-----------------------------|----------------------------|
| <b>Invasive Carcinoma</b>          | Gender                      | 0.85 (0.57, 1.27)          |
|                                    | Strain                      | 1.90 (1.27, 2.85)          |
| <b>Bronchial Extension</b>         | Gender                      | 0.95 (0.67, 1.36)          |
|                                    | Strain                      | 0.73 (0.51, 1.05)          |
| <b>Pneumonia</b>                   | Gender                      | 1.32 (0.93, 1.87)          |
|                                    | Strain                      | 0.35 (0.24, 0.50)          |
| <b>Lymphoma</b>                    | Gender                      | 2.23 (1.28, 3.88)          |
|                                    | Strain                      | 1.94 (1.13, 3.32)          |
| <b>Leukemia</b>                    | Gender                      | 1.28 (0.68, 2.38)          |
|                                    | Strain                      | 4.18 (2.08, 8.42)          |
| <b>Myeloproliferative Disorder</b> | Gender                      | 1.37 (0.60, 3.14)          |
|                                    | Strain                      | 7.69 (2.57, 23.02)         |

Relative to unirradiated K-ras<sup>LA1</sup> mice; Gender relative to males; Strain relative to 129S2



**Supplementary Table 3. Logistic Regression Analysis of Radiation Effects on the Incidence of Invasive Adenocarcinoma Controlling for Gender and Strain.**

| <b>Experimental Group</b>   | <b>Independent Variable</b> | <b>Odds Ratio (95% CI)</b> |
|-----------------------------|-----------------------------|----------------------------|
| <b>X- 1.0 x 1</b>           | Gender                      | 1.19 (0.45, 3.19)          |
|                             | Strain                      | 1.24 (0.46, 3.34)          |
| <b>X- 0.2 x 5</b>           | Gender                      | 1.19 (0.44, 3.19)          |
|                             | Strain                      | 1.50 (0.55, 4.07)          |
| <b>X- 0.4 x 5</b>           | Gender                      | 3.00 (1.13, 7.99)          |
|                             | Strain                      | 3.09 (1.15, 8.30)          |
| <b>Fe- 0.1 Gy x 1</b>       | Gender                      | 2.61 (1.10, 6.19)          |
|                             | Strain                      | 2.63 (1.10, 6.29)          |
| <b>Fe- 0.2 Gy x 1</b>       | Gender                      | 0.96 (0.37, 2.47)          |
|                             | Strain                      | 0.98 (0.38, 2.54)          |
| <b>Fe- 1.0 Gy x 1</b>       | Gender                      | 1.29 (0.55, 3.05)          |
|                             | Strain                      | 1.37 (0.58, 3.25)          |
| <b>Fe- 0.2 Gy x 5</b>       | Gender                      | 2.47 (1.05, 5.80)          |
|                             | Strain                      | 2.62 (1.11, 6.20)          |
| <b>Fe- 0.1 Gy x 5</b>       | Gender                      | 1.51 (0.57, 3.99)          |
|                             | Strain                      | 1.56 (0.59, 4.15)          |
| <b>Fe- (0.1 Gy x 5) x 2</b> | Gender                      | 1.89 (0.72, 4.95)          |
|                             | Strain                      | 1.75 (0.67, 4.63)          |

Relative to unirradiated K-ras<sup>LA1</sup> mice; Gender relative to males; Strain relative to 129S2

**Supplementary Table 4. Multivariate Cox Analysis for Gender and Strain Effects on Overall Survival Controlling for Experiment.**

| <b>Phenotype</b>        | <b>Independent Variable</b> | <b>Hazard Ratio (95% CI)</b> |
|-------------------------|-----------------------------|------------------------------|
| <b>Overall Survival</b> | Gender                      | 1.17 (0.99, 1.39)            |
|                         | Strain                      | 0.75 (0.63, 0.90)            |

Relative to unirradiated K-ras<sup>LA1</sup> mice; Gender relative to males; Strain relative to 129S2

**Supplementary Table 5. Multivariate Cox Analysis of Radiation Effects on Overall Survival Controlling for Gender and Strain Effects.**

| <b>Experimental Group</b>   | <b>Independent Variable</b> | <b>Hazard Ratio (95% CI)</b> |
|-----------------------------|-----------------------------|------------------------------|
| <b>X- 1.0 x 1</b>           | Gender                      | 1.73 (1.13, 2.64)            |
|                             | Strain                      | 1.68 (1.10, 2.57)            |
| <b>X- 0.2 x 5</b>           | Gender                      | 1.56 (1.02, 2.40)            |
|                             | Strain                      | 1.41 (0.92, 2.17)            |
| <b>X- 0.4 x 5</b>           | Gender                      | 3.00 (1.87, 4.81)            |
|                             | Strain                      | 3.09 (1.92, 4.95)            |
| <b>Fe- 0.1 Gy x 1</b>       | Gender                      | 2.07 (1.40, 3.04)            |
|                             | Strain                      | 2.12 (1.44, 3.12)            |
| <b>Fe- 0.2 Gy x 1</b>       | Gender                      | 2.97 (2.01, 4.38)            |
|                             | Strain                      | 2.99 (2.03, 4.41)            |
| <b>Fe- 1.0 Gy x 1</b>       | Gender                      | 3.39 (2.34, 4.91)            |
|                             | Strain                      | 3.46 (2.39, 5.01)            |
| <b>Fe- 0.2 Gy x 5</b>       | Gender                      | 2.99 (2.03, 4.40)            |
|                             | Strain                      | 2.95 (2.00, 4.35)            |
| <b>Fe- 0.1 Gy x 5</b>       | Gender                      | 2.09 (1.40, 3.12)            |
|                             | Strain                      | 2.24 (1.49, 3.34)            |
| <b>Fe- (0.1 Gy x 5) x 2</b> | Gender                      | 5.19 (3.35, 8.04)            |
|                             | Strain                      | 5.51 (3.59, 8.56)            |

Relative to unirradiated K-ras<sup>LA1</sup> mice; Gender relative to males; Strain relative to 129S2

**Supplementary Table 6. IPA Network Annotations Associated with Corresponding Gene Lists.**

| <b>Gene List</b>                      | <b>Number of Networks</b> | <b>Network Number</b> | <b>Network Functions</b>                                                                       | <b>Number of ANOVA Genes Included (% Total)</b> |
|---------------------------------------|---------------------------|-----------------------|------------------------------------------------------------------------------------------------|-------------------------------------------------|
| <b>ANOVA</b>                          | 10                        | 1                     | DNA Replication, Recombination, and Repair; Gene Expression; Infectious Disease                | 54 (8.5%)                                       |
|                                       |                           | 2                     | Gene Expression; Cell Cycle; DNA Replication, Recombination, and Repair                        | 50 (7.9%)                                       |
|                                       |                           | 3                     | Cellular Movement; Immune Cell Trafficking; Gastrointestinal Disease                           | 46 (7.3%)                                       |
|                                       |                           | 4                     | Developmental Disorder; Cell-To-Cell Signaling and Interaction; Tissue Development             | 42 (6.6%)                                       |
|                                       |                           | 5                     | Humoral Immune Response; Protein Synthesis; Cellular Compromise                                | 42 (6.6%)                                       |
|                                       |                           | 6                     | Infectious Disease; Cell Cycle; Organismal Development                                         | 40 (6.3%)                                       |
|                                       |                           | 7                     | Cancer; Hematological Disease; Organismal Injury and Abnormalities                             | 39 (6.2%)                                       |
|                                       |                           | 8                     | Post-Translational Modification; Cell Death and Survival; Tumor Morphology                     | 38 (6.0%)                                       |
|                                       |                           | 9                     | Cell Death and Survival; Cancer; Neurological Disease                                          | 34 (5.4%)                                       |
|                                       |                           | 10                    | Cell Cycle; DNA Replication, Recombination, and Repair; Cell-To-Cell Signaling and Interaction | 33 (5.2%)                                       |
| <b>Fractionated Classifier</b>        | 3                         | 1                     | Infectious Disease; DNA Replication, Recombination, and Repair; Gene Expression                | 26 (57.8%)                                      |
|                                       |                           | 2                     | Small Molecule Biochemistry; Organismal Injury and Abnormalities; Renal Damage                 | 18 (40%)                                        |
|                                       |                           | 3                     | Cell Morphology; Cellular Assembly and Organization; Cellular Function and Maintenance         | 1 (2.2%)                                        |
| <b>6-gene Fractionated Classifier</b> | 1                         | 1                     | Hematological Disease; Metabolic Disease; Cellular Compromise                                  | 6 (100%)                                        |

### **Supplementary References.**

1. R Development Core Team. R: A language and environment for statistical computing. Vienna, Austria: R Foundation for Statistical Computing; 2011.
2. Gentleman RC, Carey VJ, Bates DM, Bolstad B, Dettling M, Dudoit S, et al. Bioconductor: open software development for computational biology and bioinformatics. *Genome biology*. 2004;5:R80.
3. Du P, Kibbe WA, Lin SM. lumi: a pipeline for processing Illumina microarray. *Bioinformatics*. 2008;24:1547-8.
4. Allen JD, Chen M, Xie Y. Model-Based Background Correction (MBCB): R Methods and GUI for Illumina Bead-array Data. *Journal of cancer science & therapy*. 2009;1:25-7.
5. Chen R, Li L, Butte AJ. AILUN: reannotating gene expression data automatically. *Nature methods*. 2007;4:879.
6. Pollard KS, Gilbert, H.N., Ge, Y., Taylor, S., Dudoit, S. multtest: Resampling-based multiple hypothesis testing. R package version 2.12.02012.
7. Coombes KR. ClassDiscovery: Classes and methods for "class discovery" with microarrays or proteomics. R package version 2.13.02009.
8. Kolde R. pheatmap: Pretty Heatmaps. R package version 0.7.32012.
9. Pounds S, Morris SW. Estimating the occurrence of false positives and false negatives in microarray studies by approximating and partitioning the empirical distribution of p-values. *Bioinformatics*. 2003;19:1236-42.
10. Coombes KR. ClassComparison: Classes and methods for "class comparison" problems on microarrays. R package version 2.12.02010.

11. Oksanen J, Blanchet, F.G., Kindt, R., Legendre, P., Minchin, P.R., O'Hara, R.B., Simpson, G.L., Solymos, P., Stevens, M.H.H., Wagner, H. *vegan: Community Ecology Package*. R package version 2.0-42012.
12. MacQueen J. Some methods for classification and analysis of multivariate observations. In: Le Cam LM, Neyman, J., editor. *Proceedings of the Fifth Berkeley Symposium on Mathematical Statistics*; 1967; Berkeley, CA: University of California Press. p. 281-97.
13. Shedden K, Taylor JM, Enkemann SA, Tsao MS, Yeatman TJ, Gerald WL, et al. Gene expression-based survival prediction in lung adenocarcinoma: a multi-site, blinded validation study. *Nature medicine*. 2008;14:822-7.
14. Irizarry RA, Bolstad BM, Collin F, Cope LM, Hobbs B, Speed TP. Summaries of Affymetrix GeneChip probe level data. *Nucleic acids research*. 2003;31:e15.
15. Bolstad BM, Irizarry RA, Astrand M, Speed TP. A comparison of normalization methods for high density oligonucleotide array data based on variance and bias. *Bioinformatics*. 2003;19:185-93.
16. Tomida S, Takeuchi T, Shimada Y, Arima C, Matsuo K, Mitsudomi T, et al. Relapse-related molecular signature in lung adenocarcinomas identifies patients with dismal prognosis. *Journal of clinical oncology : official journal of the American Society of Clinical Oncology*. 2009;27:2793-9.
17. Smyth GK. *Limma: linear models for microarray data*. In: Gentleman R, Carey, V., Dudoit, S., Irizarry, R., Huber, W., editor. *Bioinformatics and Computational Biology Solutions using R and Bioconductor*. Springer, New York2005.

18. Raponi M, Zhang Y, Yu J, Chen G, Lee G, Taylor JM, et al. Gene expression signatures for predicting prognosis of squamous cell and adenocarcinomas of the lung. *Cancer research*. 2006;66:7466-72.
19. Miller LD, Smeds J, George J, Vega VB, Vergara L, Ploner A, et al. An expression signature for p53 status in human breast cancer predicts mutation status, transcriptional effects, and patient survival. *Proceedings of the National Academy of Sciences of the United States of America*. 2005;102:13550-5.
20. Pawitan Y, Bjohle J, Amler L, Borg AL, Egyhazi S, Hall P, et al. Gene expression profiling spares early breast cancer patients from adjuvant therapy: derived and validated in two population-based cohorts. *Breast cancer research : BCR*. 2005;7:R953-64.
21. Loi S, Haibe-Kains B, Desmedt C, Lallemand F, Tutt AM, Gillet C, et al. Definition of clinically distinct molecular subtypes in estrogen receptor-positive breast carcinomas through genomic grade. *Journal of clinical oncology : official journal of the American Society of Clinical Oncology*. 2007;25:1239-46.
22. Venet D, Dumont JE, Detours V. Most random gene expression signatures are significantly associated with breast cancer outcome. *PLoS computational biology*. 2011;7:e1002240.
23. Therneau T, and original Splus-> port by Lumley T. survival: Survival analysis, including penalised likelihood. R package version 2.36-102011.

Figure S1

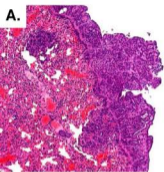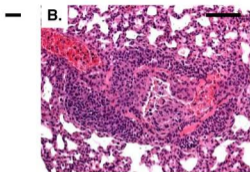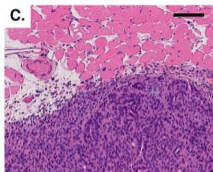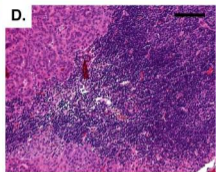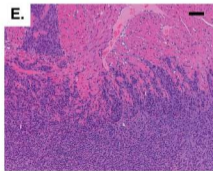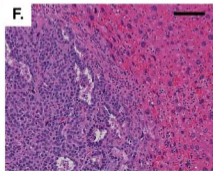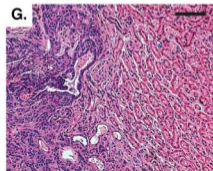



Figure S2

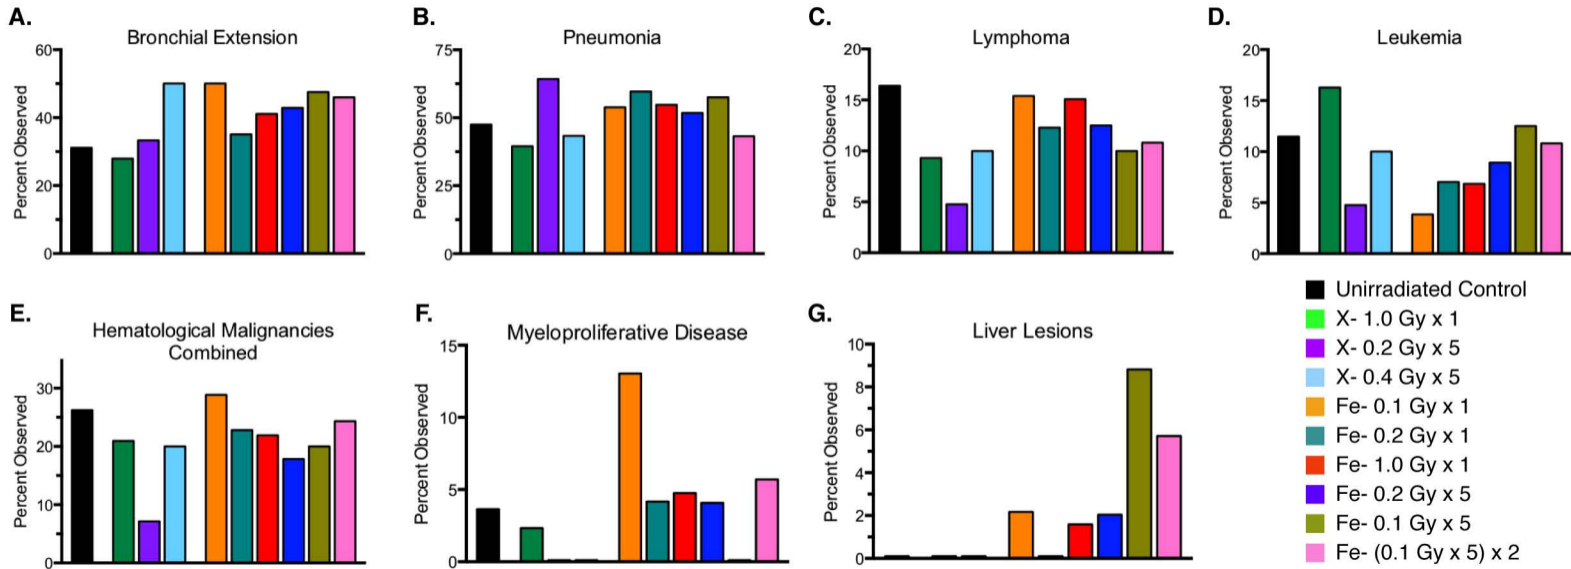

A.

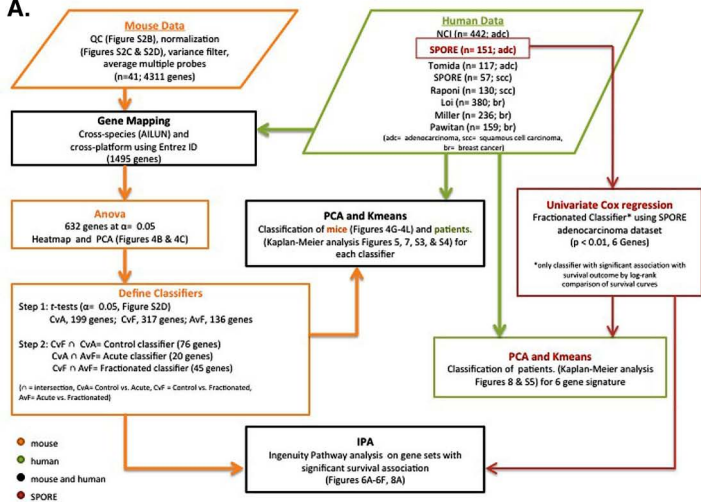

D.

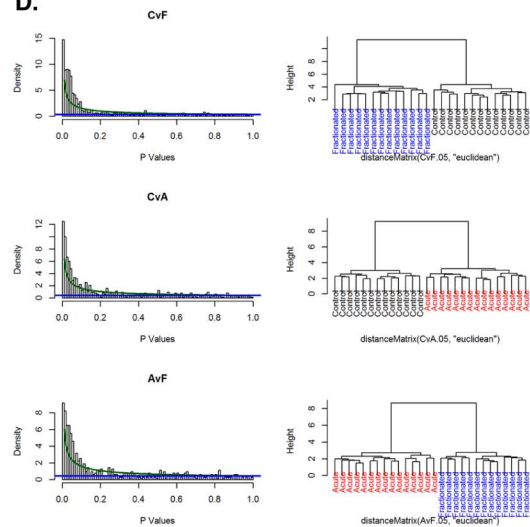

B.

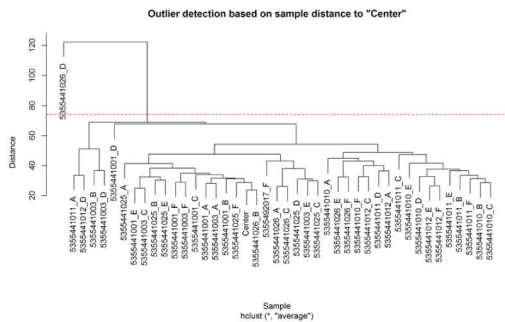

C.

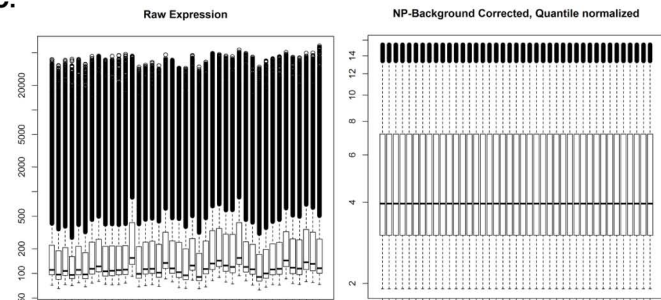

Figure S4

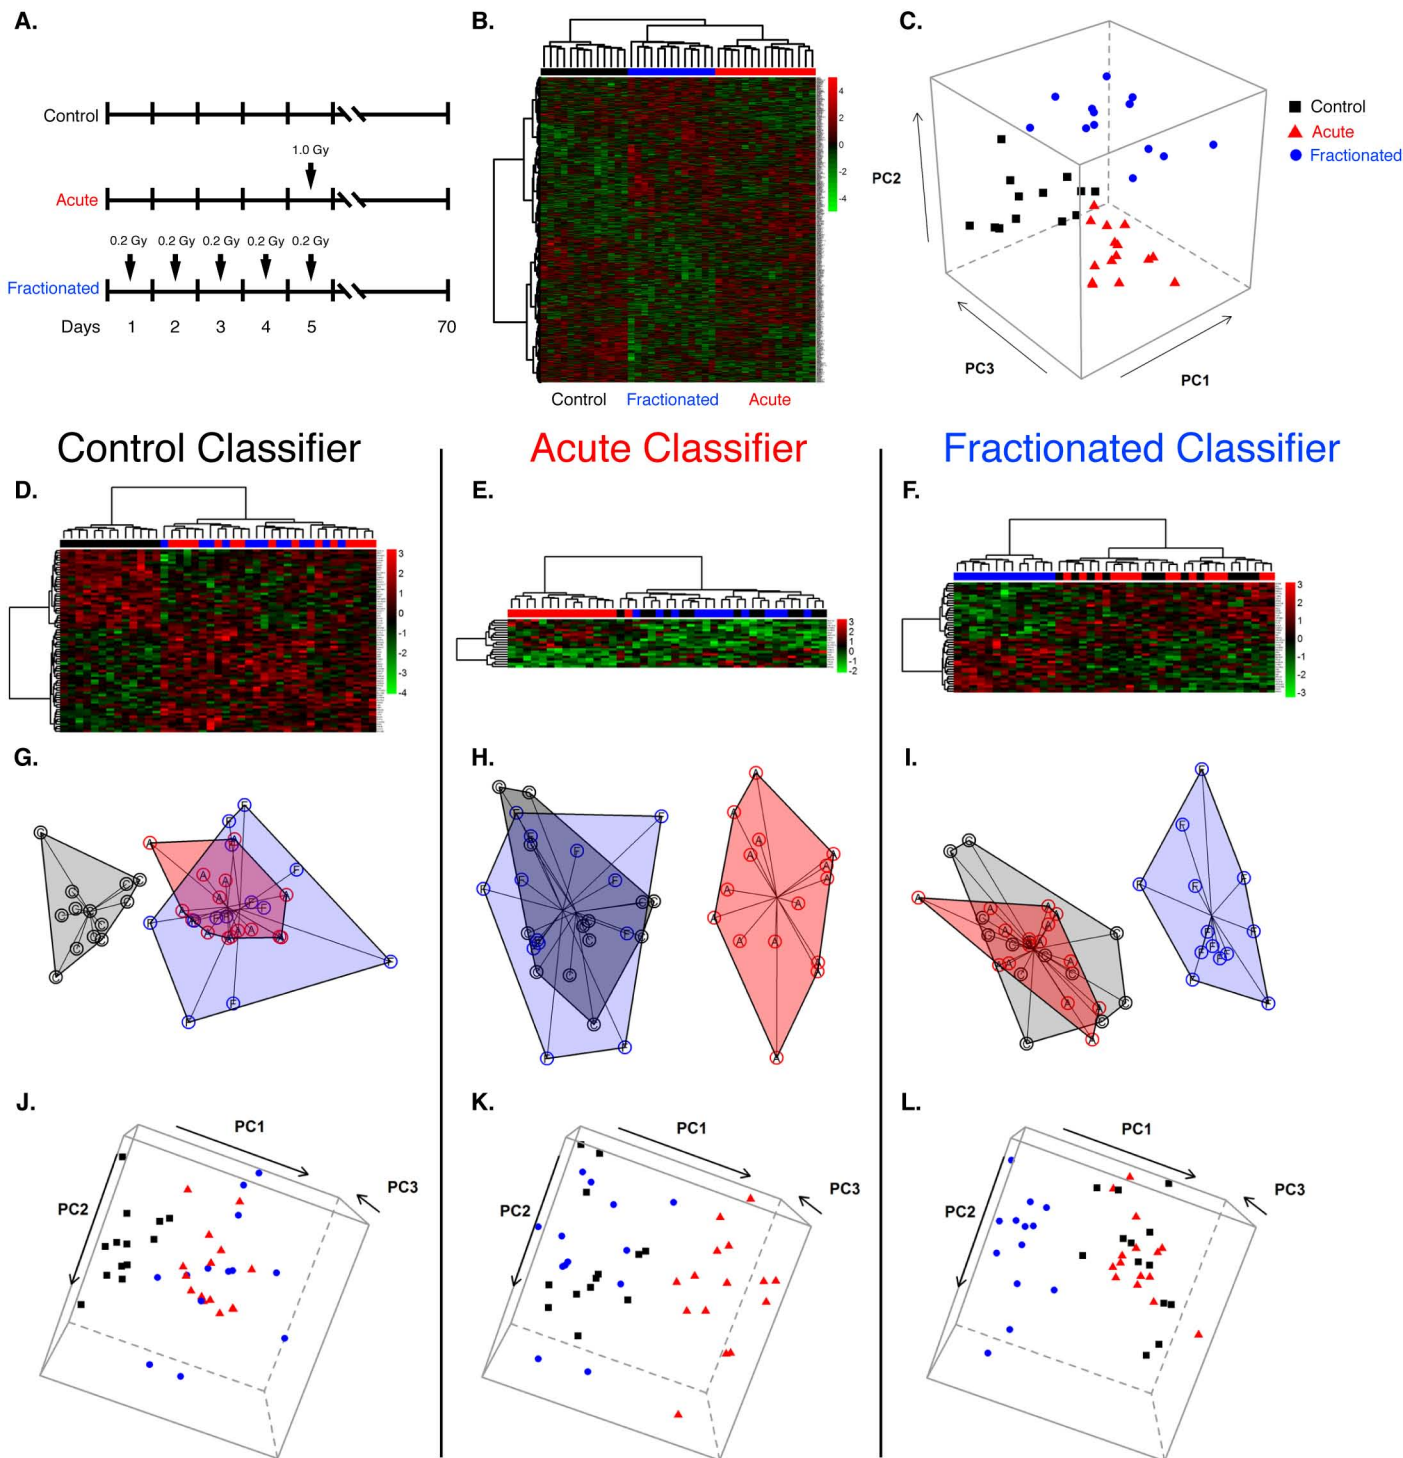

Figure S5

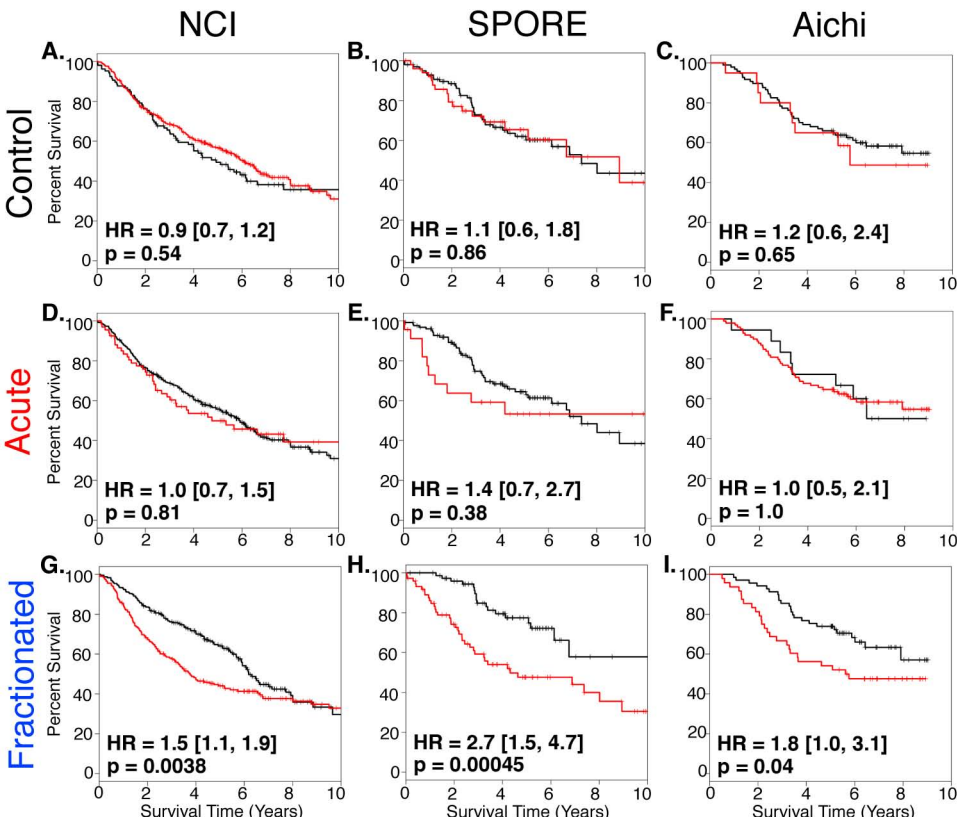

# Figure S6

## Breast Adenocarcinoma

## Lung Squamous Carcinoma

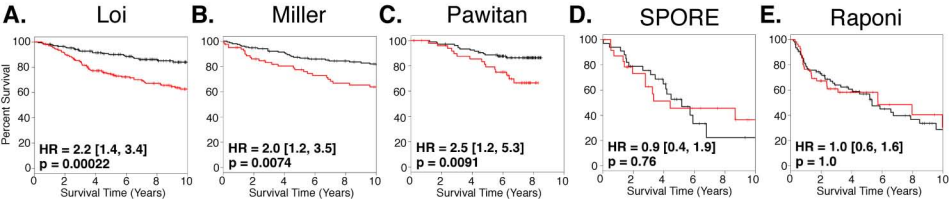

Figure S7

Lung Adenocarcinoma

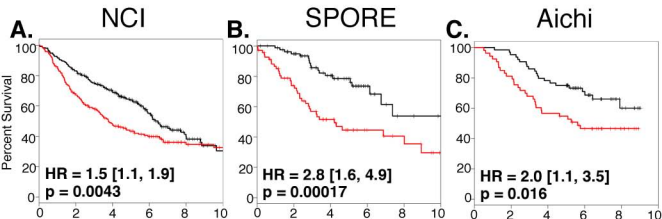

Breast Adenocarcinoma

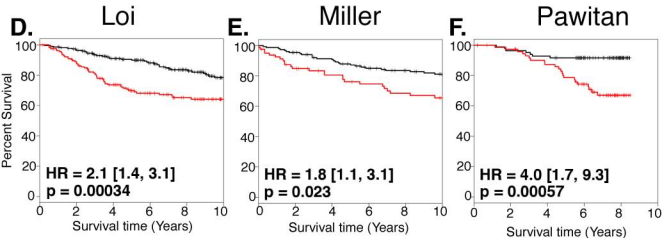

Lung Squamous Cell Carcinoma

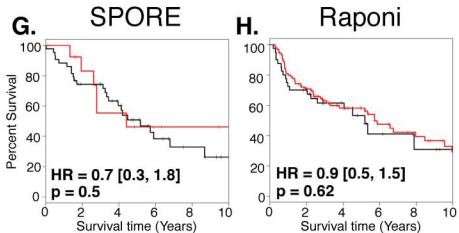

Supplement: NIHMS561304-supplement-1.pdf [file NIHMS561304-supplement-1.pdf]
